# Supplementary material for: Mismatch negativity in common marmosets: Whole-cortical recordings with multi-channel electrocorticograms
Source: PubMed Central journal article supplement (PMC4601015; doi:10.1038/srep15006), 2015-10-12
Supplement: srep15006-s1.pdf [file srep15006-s1.pdf]

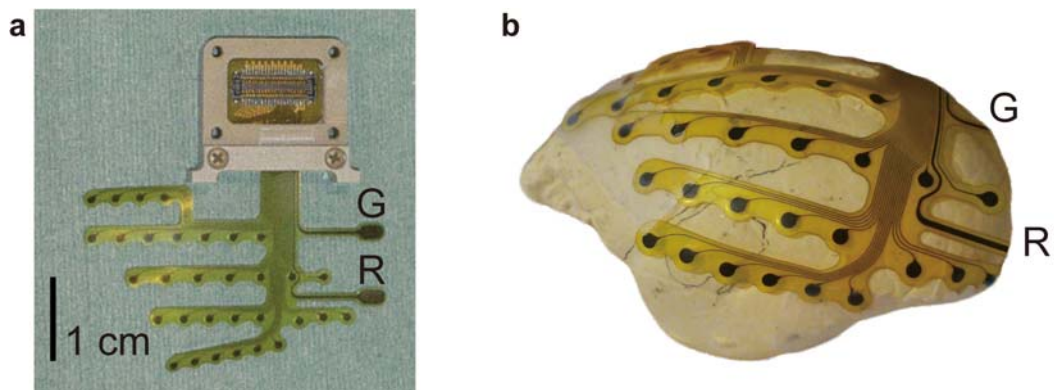

**Supplementary Figure S1. The ECoG electrode array.** (a) The complete electrode array and connector viewed from front. (b) A fitting example of the array on a model brain.
