# Supplementary material for: Mismatch negativity in common marmosets: Whole-cortical recordings with multi-channel electrocorticograms
Source: PubMed Central journal article supplement (PMC4601015; doi:10.1038/srep15006), 2015-10-12
Supplement: srep15006-s3.pdf [file srep15006-s3.pdf]

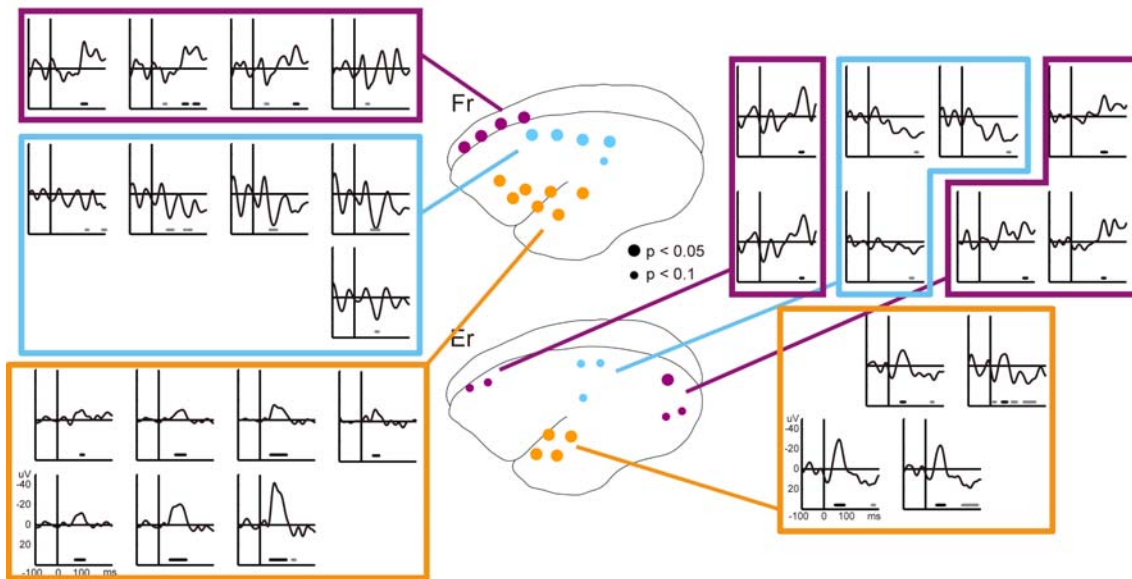

**Supplementary Figure S3. Individual difference waveforms.** The individual difference waveforms at the electrodes that revealed significant difference between standard and deviant ERPs are shown. The vertical bars indicate the onset of the stimuli.
